# Supplementary figures and images for: Goal seeking in honeybees: matching of optic flow snapshots?
Source: Oxford University Press journal article supplement (doi:10.1242/jeb.043737), 2010-08-13

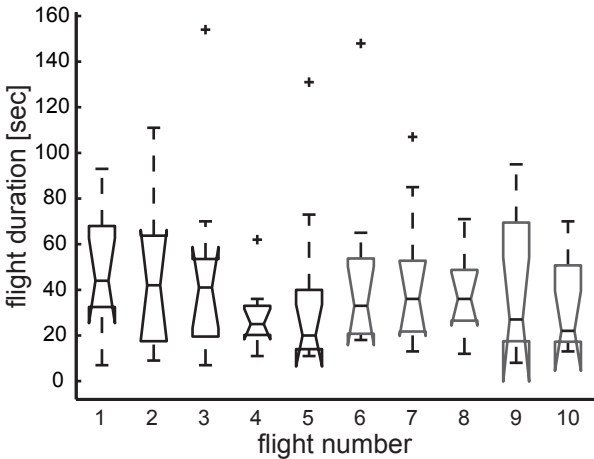

Supplement: jeb043737-sup-043737figs1.pdf [file jeb043737-sup-043737figs1.pdf]

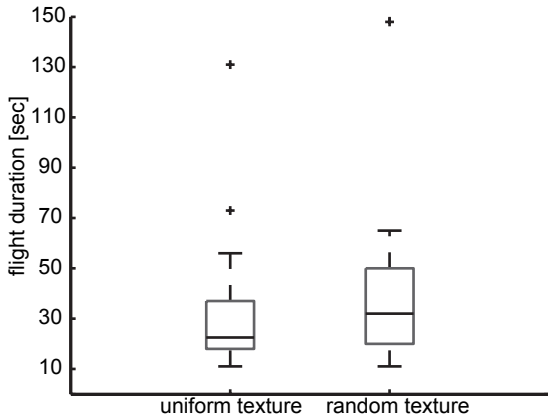

Supplement: jeb043737-sup-043737figs2.pdf [file jeb043737-sup-043737figs2.pdf]

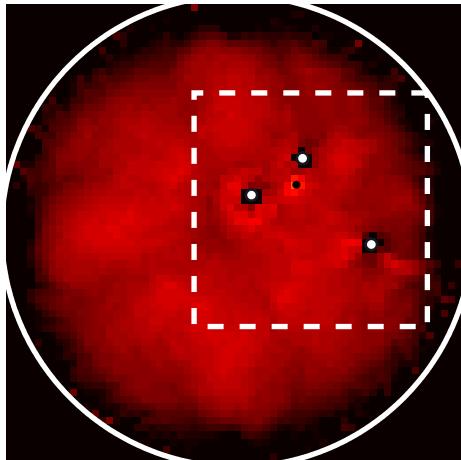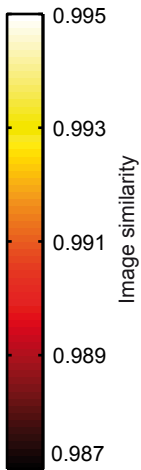

Supplement: jeb043737-sup-043737figs3.pdf [file jeb043737-sup-043737figs3.pdf]

A

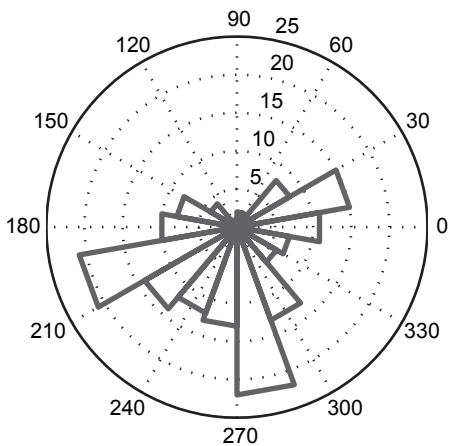

B

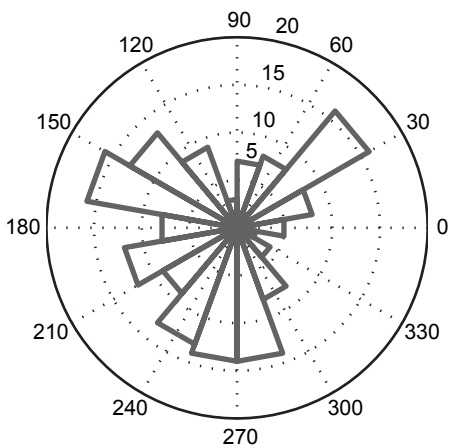

C

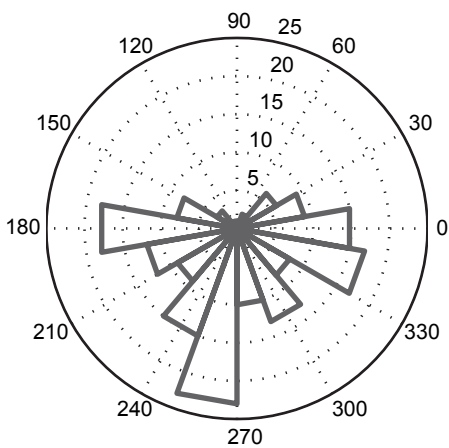

Supplement: jeb043737-sup-043737figs4.pdf [file jeb043737-sup-043737figs4.pdf]
